# Supplementary material for: Effect of Vitamin K on Bone Mineral Density and Fracture Risk in Adults: Systematic Review and Meta-Analysis
Source: MDPI journal article supplement (doi:10.3390/biomedicines10051048), 2022-05-01
Supplement: s1 [file s1]

**Effect of Vitamin K on Bone Mineral Density and Fracture Risk in Adults: Systematic  
Review and Meta-analysis**

**SUPPLEMENTARY MATERIAL S1**

**\*Search strategy for Pub Med**

**VITAMIN**

**ENTRY TERMS:** Vitamin K1, Phytonadione, Phytomenadione, Phylloquinone, Phyllohydroquinone, Aquamephyton, Konakion, Menaquinones, Vitamin K2, Menaquinone, Vitamin K Quinone, Vitamin K3, 2-Methylnaphthoquinone, Menadione, 2-Methyl-1,4-naphthalenedione, 2-Methyl-1,4-naphthoquinone, Menadione Sodium Bisulfite, Bisulfite, Menadione Sodium, Sodium Bisulfite, Menadione, Vitamin K3 Sodium Bisulfite, Vicasol, Vikasol, Menadione Bisulfite, Bisulfite, Menadione, Menadione Sodium Bisulfite, Trihydrate.

**KEY WORDS:** “Vitamin K”, “Phylloquinone”, “Vitamin K1”, “VitaminK2”, “Vitamin K3”, “2-Methyl naphthoquinone”, “Menadione, 2-methyl-1, 4- naphthoquinone”, “Bisulfite menadione”

| Sr.<br>no. | Terms                    | Database | Results |
|------------|--------------------------|----------|---------|
| 1.         | Vitamin K                | PMC      | 27, 852 |
| 2.         | Vitamin K1               | PMC      | 6371    |
| 3.         | Phylloquinone            | PMC      | 1899    |
| 4.         | Vitamin K2               | PMC      | 4413    |
| 5.         | Vitamin K3               | PMC      | 3424    |
| 6.         | Vitamin K                | MeSH     | 26      |
| 7.         | Vitamin K1               | MeSH     | 10      |
| 8.         | Vitamin K2               | MeSH     | 5       |
| 9.         | Vitamin K3               | MeSH     | 3       |
| 10.        | 2- Methyl naphthoquinone | MeSH     | 44      |
| 11.        | Menadione                | MeSH     | 12      |

|     |                                                    |      |      |
|-----|----------------------------------------------------|------|------|
| 12. | 2-methyl-1, 4- naphthoquinone                      | MeSH | 2    |
| 13. | Bisulfite menadione                                | MeSH | 3    |
| 14. | “Vitamin K 1” OR “Vitamin K 2” OR<br>“Vitamin K 3” | MeSH | 6243 |

## OSTEOPOROSIS

**ENTRY TERMS:** Osteoporoses, Osteoporosis, Post-Traumatic, Osteoporosis, Post Traumatic, Post-Traumatic Osteoporoses, Post-Traumatic Osteoporosis, Osteoporosis, Senile, Osteoporoses, Senile, Senile Osteoporoses, Osteoporosis, Involutional, Senile Osteoporosis, Osteoporosis, Age-Related, Osteoporosis, Age Related, Bone Loss, Age-Related, Age-Related Bone Loss, Age-Related Bone Losses, Bone Loss, Age Related, Bone Losses, Age-Related, Age-Related Osteoporosis, Age Related Osteoporosis, Age-Related Osteoporoses, Osteoporoses, Age-Related

**KEY WORDS:** “Osteoporosis”, Osteoporosis\*, “Bone density”, Bone density\*, “Fracture”, “Fractures”, Fracture\*, Fractures\*

| Sr. no. | Terms                                              | Database | Results |
|---------|----------------------------------------------------|----------|---------|
| 1.      | Osteoporosis                                       | PMC      | 102414  |
| 2.      | Osteoporosis*                                      | MeSH     | 67      |
| 3.      | Osteoporosis                                       | MeSH     | 11      |
| 4.      | Bone density                                       | MeSH     | 6       |
| 5.      | Bone density*                                      | MeSH     | 15      |
| 6.      | Fracture                                           | MeSH     | 49      |
| 7.      | Fractures                                          | MeSH     | 45      |
| 8.      | Fracture*                                          | MeSH     | 121     |
| 9.      | Fractures*                                         | MeSH     | 88      |
| 10.     | Bone Density OR Osteoporosis,<br>Postmenopausal    | MeSH     | 60,342  |
| 11.     | Osteoporosis, Postmenopausal OR<br>Fractures, Bone | MeSH     | 195662  |

|     |                               |      |        |
|-----|-------------------------------|------|--------|
| 12. | Hip Fractures OR Bone Density | MeSH | 76,619 |
|-----|-------------------------------|------|--------|

## **RANDOMIZED CONTROLLED TRIAL**

**ENTRY TERM:** Clinical trials, randomized, trial, randomized clinical, controlled clinical trials, randomized

**KEY WORDS:** "Randomized Controlled Trial"

| Sr. no. | Terms                        | Database | Results |
|---------|------------------------------|----------|---------|
| 1.      | Randomized Controlled Trial  | PMC      | 406212  |
| 2.      | Randomized Controlled Trial* | PMC      | 404353  |
| 3.      | Randomized Controlled Trial  | MeSH     | 8       |
| 4.      | Randomized Controlled Trial* | MeSH     | 11      |

## **ADVANCED SEARCH:**

| Sr. no. | Term1        | Boolean | Term2              | Results |
|---------|--------------|---------|--------------------|---------|
| 1.      | (Vitamin K)  | AND     | (Osteoporosis)     | 636     |
| 2.      | (Vitamin K)  | AND     | (Osteoporosis*)    | 645     |
| 3.      | (Vitamin K)  | AND     | (Bone density)     | 569     |
| 4.      | (Vitamin K)  | AND     | (Bone density*)    | 569     |
| 5.      | (Vitamin K)  | AND     | (Fracture, bone)   | 457     |
| 6.      | (Vitamin K)  | AND     | (Fractures, bone)  | 375     |
| 7.      | (Vitamin K1) | AND     | (Osteoporosis*)    | 93      |
| 8.      | (Vitamin K1) | AND     | (Bone density*)    | 97      |
| 9.      | (Vitamin K1) | AND     | (fractures*, bone) | 61      |

|     |                                                     |     |                                                           |          |
|-----|-----------------------------------------------------|-----|-----------------------------------------------------------|----------|
| 10. | (Vitamin K2)                                        | AND | (Osteoporosis*)                                           | 283      |
| 11. | (Vitamin K2)                                        | AND | (Bone density*)                                           | 248      |
| 12. | (Vitamin K2)                                        | AND | (Fracture*, bone)                                         | 154      |
| 13. | (Vitamin K3)                                        | AND | (Osteoporosis*)                                           | 5        |
| 14. | (Vitamin K3)                                        | AND | (Bone density*)                                           | 12       |
| 15. | (Vitamin K3)                                        | AND | (Fractures*, bone)                                        | 3        |
| 16. | ((((Vitamin K1) OR (Vitamin K2)) OR (Vitamin K3)))  | AND | (Osteoporosis*)                                           | 320      |
| 17. | ((((Vitamin K1) OR (Vitamin K2)) OR (Vitamin K3)))  | AND | (Bone density*)                                           | 306      |
| 18  | ((((Vitamin K1) OR (Vitamin K2)) OR (Vitamin K3)))  | AND | (Fractures*, bone)                                        | 145      |
| 19. | (((((Vitamin K1) OR (Vitamin K2)) OR (Vitamin K3))) | AND | (bone density*)) OR (fracture*, bone)) OR (osteoporosis*) | 256, 018 |

| <b>Sr no.</b> | <b>Term 1</b> | <b>Boolean</b> | <b>Term 2</b>      | <b>Boolean</b> | <b>Term 3</b>                  | <b>Results</b> |
|---------------|---------------|----------------|--------------------|----------------|--------------------------------|----------------|
| 1.            | ((Vitamin K)  | AND            | (Osteoporosis*))   | AND            | (Randomized controlled trials) | 91             |
| 2.            | ((Vitamin K)  | AND            | (Bone density*))   | AND            | (Randomized controlled trials) | 94             |
| 3.            | ((Vitamin K)  | AND            | (Fracture*, bone)) | AND            | (Randomized controlled trial*  | 80             |

|     |                                                   |     |                                                              |     |                                  |        |
|-----|---------------------------------------------------|-----|--------------------------------------------------------------|-----|----------------------------------|--------|
| 4.  | ((Vitamin K1)                                     | AND | (osteoporosis*))                                             | AND | (randomized clinical trial)      | 19     |
| 5.  | ((Vitamin K2)                                     | AND | osteoporosis*))                                              | AND | randomized clinical trial        | 56     |
| 6   | ((Vitamin K2)                                     | AND | (bone density*)                                              | AND | (randomized controlled trial)    | 59     |
| 7.  | ((Vitamin K2)                                     | AND | (fracture*, bone))                                           | AND | randomized clinical trial*       | 25     |
| 8.  | ((Vitamin K1)                                     | AND | (bone density))                                              | AND | (randomized controlled trial)    | 30     |
| 9.  | ((Vitamin K1)                                     | AND | (fracture, bone))                                            | AND | (randomized clinical trial)      | 17     |
| 10. | (((((Vitamin K1) OR (Vitamin K2)) OR (Vitamin K3) | AND | ((bone density*)) OR (fractures*, bone)) OR (Osteoporosis*)) | AND | ((randomized controlled trial*)) | 10,074 |

#1 ("Vitamin K 1"[MeSH Terms] OR "Vitamin K 1"[All Fields] OR ("Vitamin"[All Fields] AND "K1"[All Fields]) OR "Vitamin K1"[All Fields] OR ("Vitamin K 2"[MeSH Terms] OR "Vitamin K 2"[All Fields] OR ("vitamin"[All Fields] AND "k2"[All Fields]) OR "Vitamin K2"[All Fields])) AND ("Vitamin K 3"[MeSH

Terms] OR "Vitamin K 3"[All Fields] OR ("Vitamin"[All Fields] AND "K3"[All Fields]) OR "Vitamin K3"[All Fields]) AND "osteoporosis\*"[All Fields]

#2 ("Vitamin K"[MeSH Terms] OR "Vitamin K"[All Fields]) AND ("osteoporosis"[MeSH Terms] OR "osteoporosis"[All Fields] OR "osteoporoses"[All Fields] OR "osteoporosis, postmenopausal"[Mesh Terms] OR ("osteoporosis"[All Fields] AND "postmenopausal"[All Fields]) OR "postmenopausal osteoporosis"[All Fields])

#3 ("Vitamin K"[MeSH Terms] OR "Vitamin K"[All Fields]) AND "osteoporosis\*"[All Fields]

#4 ("Vitamin K"[MeSH Terms] OR "Vitamin K"[All Fields]) AND ("bone density"[MeSH Terms] OR ("bone"[All Fields] AND "density"[All Fields]) OR "bone density"[All Fields])

#5 ("Vitamin K"[MeSH Terms] OR "Vitamin K"[All Fields]) AND (("bone and bones"[MeSH Terms] OR ("bone"[All Fields] AND "bones"[All Fields]) OR "bone and bones"[All Fields] OR "bone"[All Fields]) AND "density\*"[All Fields])

#6 ("Vitamin K"[MeSH Terms] OR "Vitamin K"[All Fields]) AND ("fractures, bone"[MeSH Terms] OR ("fractures"[All Fields] AND "bone"[All Fields]) OR "bone fractures"[All Fields] OR ("fracture"[All Fields] AND "bone"[All Fields]) OR "fracture bone"[All Fields])

#7 ("Vitamin K"[MeSH Terms] OR "Vitamin K"[All Fields]) AND ("fractures, bone"[MeSH Terms] OR ("fractures"[All Fields] AND "bone"[All Fields]) OR "bone fractures"[All Fields] OR ("fractures"[All Fields] AND "bone"[All Fields]) OR "fractures bone"[All Fields])

#8 ("Vitamin K 1"[MeSH Terms] OR "Vitamin K 1"[All Fields] OR ("Vitamin"[All Fields] AND "K1"[All Fields]) OR "Vitamin K1"[All Fields] OR ("Vitamin K 2"[MeSH Terms] OR "Vitamin K 2"[All Fields] OR ("Vitamin"[All Fields] AND "K2"[All Fields]) OR "Vitamin K2"[All Fields]) OR ("Vitamin K 3"[MeSH Terms] OR "Vitamin K 3"[All Fields] OR ("Vitamin"[All Fields] AND "K3"[All Fields]) OR "Vitamin K3"[All Fields])) AND "osteoporosis\*"[All Fields]

#9 ("Vitamin K 1"[MeSH Terms] OR "Vitamin K 1"[All Fields] OR ("Vitamin"[All Fields] AND "K1"[All Fields]) OR "Vitamin K1"[All Fields] OR ("Vitamin K 2"[MeSH Terms] OR "Vitamin K 2"[All Fields] OR ("Vitamin"[All Fields] AND "K2"[All Fields]) OR "Vitamin K2"[All Fields]) OR ("Vitamin K 3"[MeSH Terms] OR "Vitamin K 3"[All Fields] OR ("Vitamin"[All Fields] AND "K3"[All Fields]) OR "Vitamin K3"[All Fields])) AND (("bone and bones"[MeSH Terms] OR ("bone"[All Fields] AND "bones"[All Fields]) OR "bone and bones"[All Fields] OR "bone"[All Fields]) AND "density\*"[All Fields])

#10 ("Vitamin K 1"[MeSH Terms] OR "Vitamin K 1"[All Fields] OR ("Vitamin"[All Fields] AND "K1"[All Fields]) OR "Vitamin K1"[All Fields] OR ("Vitamin K 2"[MeSH Terms] OR "Vitamin K 2"[All Fields] OR ("Vitamin"[All Fields] AND "K2"[All Fields]) OR "Vitamin K2"[All Fields]) OR ("Vitamin K 3"[MeSH Terms] OR "Vitamin K 3"[All Fields] OR ("Vitamin"[All Fields] AND "K3"[All Fields]) OR "Vitamin K3"[All Fields])) AND ("fractures\*"[All Fields] AND ("bone and bones"[MeSH Terms] OR ("bone"[All Fields] AND "bones"[All Fields]) OR "bone and bones"[All Fields] OR "bone"[All Fields]))

#11 ("Vitamin K 1"[MeSH Terms] OR "Vitamin K 1"[All Fields] OR ("Vitamin"[All Fields] AND "K1"[All Fields]) OR "Vitamin K1"[All Fields]) AND "osteoporosis\*"[All Fields]

#12 ("Vitamin K 1"[MeSH Terms] OR "Vitamin K 1"[All Fields] OR ("Vitamin"[All Fields] AND "K1"[All Fields]) OR "Vitamin K1"[All Fields]) AND (("bone and bones"[MeSH Terms] OR ("bone"[All Fields] AND "bones"[All Fields]) OR "bone and bones"[All Fields] OR "bone"[All Fields]) AND "density\*"[All Fields])

#13 ("Vitamin K 1"[MeSH Terms] OR "Vitamin K 1"[All Fields] OR ("Vitamin"[All Fields] AND "K1"[All Fields]) OR "Vitamin K1"[All Fields]) AND ("fractures\*"[All Fields] AND ("bone and bones"[MeSH Terms] OR ("bone"[All Fields] AND "bones"[All Fields]) OR "bone and bones"[All Fields] OR "bone"[All Fields]))

#14 ("Vitamin K 2"[MeSH Terms] OR "Vitamin K 2"[All Fields] OR ("Vitamin"[All Fields] AND "K2"[All Fields]) OR "Vitamin K2"[All Fields]) AND "osteoporosis\*"[All Fields]

#15 ("Vitamin K 2"[MeSH Terms] OR "Vitamin K 2"[All Fields] OR ("Vitamin"[All Fields] AND "K2"[All Fields]) OR "Vitamin K2"[All Fields]) AND (("bone and bones"[MeSH Terms] OR ("bone"[All Fields] AND "bones"[All Fields]) OR "bone and bones"[All Fields] OR "bone"[All Fields]) AND "density\*"[All Fields])

#16 ("Vitamin K 2"[MeSH Terms] OR "Vitamin K 2"[All Fields] OR ("Vitamin"[All Fields] AND "K2"[All Fields]) OR "Vitamin K2"[All Fields]) AND ("fracture\*"[All Fields] AND ("bone and bones"[MeSH Terms] OR ("bone"[All Fields] AND "bones"[All Fields]) OR "bone and bones"[All Fields] OR "bone"[All Fields]))

#17 ("Vitamin K 3"[MeSH Terms] OR "Vitamin K 3"[All Fields] OR ("Vitamin"[All Fields] AND "K3"[All Fields]) OR "Vitamin K3"[All Fields]) AND "osteoporosis\*"[All Fields]

#18 ("Vitamin K 3"[MeSH Terms] OR "Vitamin K3"[All Fields] OR ("Vitamin"[All Fields] AND "K3"[All Fields]) OR "Vitamin K3"[All Fields]) AND (("bone and bones"[MeSH Terms] OR ("bone"[All Fields] AND "bones"[All Fields]) OR "bone and bones"[All Fields] OR "bone"[All Fields]) AND "density\*"[All Fields])

#19 ("Vitamin K 3"[MeSH Terms] OR "Vitamin K 3"[All Fields] OR ("Vitamin"[All Fields] AND "K3"[All Fields]) OR "Vitamin K3"[All Fields]) AND ("fractures\*"[All Fields] AND ("bone and bones"[MeSH Terms] OR ("bone"[All Fields] AND "bones"[All Fields]) OR "bone and bones"[All Fields] OR "bone"[All Fields]))

#20 (("Vitamin K1"[MeSH Terms] OR "Vitamin K 1"[All Fields] OR ("Vitamin"[All Fields] AND "K1"[All Fields]) OR "Vitamin K1"[All Fields] OR ("Vitamin K 2"[MeSH Terms] OR "Vitamin K 2"[All Fields] OR ("Vitamin"[All Fields] AND "K2"[All Fields]) OR "Vitamin K2"[All Fields]) OR ("Vitamin K 3"[MeSH Terms] OR "Vitamin K 3"[All Fields] OR ("Vitamin"[All Fields] AND "K3"[All Fields]) OR "Vitamin K3"[All Fields])) AND (("bone and bones"[MeSH Terms] OR ("bone"[All Fields] AND "bones"[All Fields]) OR "bone and bones"[All Fields] OR "bone"[All Fields] AND "density\*"[All Fields])) OR ("fracture\*"[All Fields] AND ("bone and bones"[MeSH Terms] OR ("bone"[All Fields] AND "bones"[All Fields]) OR "bone and bones"[All Fields] OR "bone"[All Fields])) OR "osteoporosis\*"[All Fields]

#21 ("Vitamin K"[MeSH Terms] OR "Vitamin K"[All Fields]) AND "osteoporosis\*"[All Fields] AND ("randomized controlled trial"[Publication Type] OR "randomized controlled trials as topic"[MeSH Terms] OR "randomized controlled trials"[All Fields] OR "randomized controlled trials"[All Fields])

#22 ("Vitamin K"[MeSH Terms] OR "Vitamin K"[All Fields]) AND (("bone and bones"[MeSH Terms] OR ("bone"[All Fields] AND "bones"[All Fields]) OR "bone and bones"[All Fields] OR "bone"[All Fields]) AND "density\*"[All Fields]) AND ("randomized controlled trial"[Publication Type] OR "randomized controlled trials as topic"[MeSH Terms] OR "randomized controlled trial"[All Fields] OR "randomised controlled trial"[All Fields])

#23 ("Vitamin K"[MeSH Terms] OR "Vitamin K"[All Fields]) AND ("fracture\*"[All Fields] AND ("bone and bones"[MeSH Terms] OR ("bone"[All Fields] AND "bones"[All Fields]) OR "bone and bones"[All Fields] OR "bone"[All Fields])) AND (("random allocation"[MeSH Terms] OR ("random"[All Fields] AND "allocation"[All Fields]) OR "random allocation"[All Fields] OR "random"[All Fields] OR "randomization"[All Fields] OR "randomized"[All Fields] OR "randomization"[All Fields] OR "randomizations"[All Fields] OR "randomise"[All Fields] OR "randomized"[All Fields] OR

"randomizing"[All Fields] OR "randomizations"[All Fields] OR "randomize"[All Fields] OR "randomizes"[All Fields] OR "randomizing"[All Fields] OR "randomness"[All Fields] OR "randoms"[All Fields]) AND "controlled"[All Fields] AND "trial\*"[All Fields])

#24 ("Vitamin K 1"[MeSH Terms] OR "Vitamin K 1"[All Fields] OR ("Vitamin"[All Fields] AND "K1"[All Fields]) OR "Vitamin K1"[All Fields]) AND "osteoporosis\*"[All Fields] AND ("randomized controlled trial"[Publication Type] OR "randomized controlled trials as topic"[MeSH Terms] OR "randomized clinical trial"[All Fields] OR "randomized clinical trial"[All Fields])

#25 ("Vitamin K 2"[MeSH Terms] OR "Vitamin K 2"[All Fields] OR ("Vitamin"[All Fields] AND "K2"[All Fields]) OR "Vitamin K2"[All Fields]) AND "osteoporosis\*"[All Fields] AND

("randomized controlled trial"[Publication Type] OR "randomized controlled trials as topic"[MeSH Terms] OR "randomized controlled trial"[All Fields] OR "randomized controlled trial"[All Fields])

#26 "Vitamin"[All Fields] AND "K3"[All Fields] AND "osteoporosis\*"[All Fields] AND ("randomized"[All Fields] AND "controlled"[All Fields] AND "trial"[All Fields])

#27 "Vitamin"[All Fields] AND "K3"[All Fields] AND ("bone"[All Fields] AND "density\*"[All Fields]) AND ("randomized"[All Fields] AND "controlled"[All Fields] AND "trial"[All Fields])

#28 ("Vitamin K 2"[MeSH Terms] OR "Vitamin K 2"[All Fields] OR ("vitamin"[All Fields] AND "K2"[All Fields]) OR "Vitamin K2"[All Fields]) AND (("bone and bones"[MeSH Terms] OR ("bone"[All Fields] AND "bones"[All Fields]) OR "bone and bones"[All Fields] OR "bone"[All Fields]) AND "density\*"[All Fields]) AND ("randomized controlled trial"[Publication Type] OR "randomized controlled trials as topic"[MeSH Terms] OR "randomized controlled trial"[All Fields] OR "randomised controlled trial"[All Fields])

#29 ("Vitamin K 2"[MeSH Terms] OR "Vitamin K 2"[All Fields] OR ("vitamin"[All Fields] AND "K2"[All Fields]) OR "Vitamin K2"[All Fields]) AND ("fracture\*"[All Fields] AND ("bone and bones"[MeSH Terms] OR ("bone"[All Fields] AND "bones"[All Fields]) OR "bone and bones"[All Fields] OR "bone"[All Fields])) AND (("random allocation"[MeSH Terms] OR ("random"[All Fields] AND "allocation"[All Fields]) OR "random allocation"[All Fields] OR "random"[All Fields] OR "randomization"[All Fields] OR "randomized"[All Fields] OR "randomization"[All Fields] OR "randomizations"[All Fields] OR "randomise"[All Fields] OR "randomized"[All Fields] OR "randomizing"[All Fields] OR "randomizations"[All Fields] OR "randomize"[All Fields] OR "randomizes"[All Fields] OR "randomizing"[All Fields] OR "randomness"[All Fields] OR

"randoms"[All Fields]) AND ("ambulatory care facilities"[MeSH Terms] OR ("ambulatory"[All Fields] AND "care"[All Fields] AND "facilities"[All Fields]) OR "ambulatory care facilities"[All Fields] OR "clinic"[All Fields] OR "clinic s"[All Fields] OR "clinical"[All Fields] OR "clinically"[All Fields] OR "clinicals"[All Fields] OR "clinics"[All Fields]) AND "trial\*"[All Fields])

#30 ("Vitamin K 1"[MeSH Terms] OR "Vitamin K 1"[All Fields] OR ("vitamin"[All Fields] AND "K1"[All Fields]) OR "Vitamin K1"[All Fields]) AND ("bone density"[MeSH Terms] OR ("bone"[All Fields] AND "density"[All Fields]) OR "bone density"[All Fields]) AND ("randomized controlled trial"[Publication Type] OR "randomized controlled trials as topic"[MeSH Terms] OR "randomized controlled trial"[All Fields] OR "randomized controlled trial"[All Fields])

#31 ("Vitamin K 1"[MeSH Terms] OR "Vitamin K 1"[All Fields] OR ("Vitamin"[All Fields] AND "K1"[All Fields]) OR "Vitamin K1"[All Fields]) AND ("fractures, bone"[MeSH Terms] OR ("fractures"[All Fields] AND "bone"[All Fields]) OR "bone fractures"[All Fields] OR ("fracture"[All Fields] AND "bone"[All Fields]) OR "fracture bone"[All Fields]) AND ("randomized controlled trial"[Publication Type] OR "randomized controlled trials as topic"[MeSH Terms] OR "randomized clinical trial"[All Fields] OR "randomised clinical trial"[All Fields])

#32 (((("Vitamin K 1"[MeSH Terms] OR "Vitamin K 1"[All Fields] OR ("Vitamin"[All Fields] AND "K1"[All Fields]) OR "Vitamin K1"[All Fields] OR ("Vitamin K 2"[MeSH Terms] OR "Vitamin K 2"[All Fields] OR ("Vitamin"[All Fields] AND "K2"[All Fields]) OR "Vitamin K2"[All Fields]) OR ("Vitamin K 3"[MeSH Terms] OR "Vitamin K 3"[All Fields] OR ("Vitamin"[All Fields] AND "K3"[All Fields]) OR "Vitamin K3"[All Fields])) AND (("bone and bones"[MeSH Terms] OR ("bone"[All Fields] AND "bones"[All Fields]) OR "bone and bones"[All Fields] OR "bone"[All Fields]) AND "density\*" [All Fields])) OR ("fractures\*" [All Fields] AND ("bone and bones"[MeSH Terms] OR ("bone"[All Fields] AND "bones"[All Fields]) OR "bone and bones"[All Fields] OR "bone"[All Fields])) OR "osteoporosis\*" [All Fields]) AND (("random allocation"[MeSH Terms] OR ("random"[All Fields] AND "allocation"[All Fields]) OR "random allocation"[All Fields] OR "random"[All Fields] OR "randomization"[All Fields] OR "randomized"[All Fields] OR "randomization"[All Fields] OR "randomizations"[All Fields] OR "randomise"[All Fields] OR "randomized"[All Fields] OR "randomizing"[All Fields] OR "randomizations"[All Fields] OR "randomize"[All Fields] OR "randomizes"[All Fields] OR "randomizing"[All Fields] OR "randomness"[All Fields] OR "randoms"[All Fields]) AND "controlled"[All Fields] AND "trial\*" [All Fields])

## \* Search strategy for Cochrane database

### Vitamin K

**Entry term:** Vitamin K

**Phrase matches:** Vitamin K, Vitamin K2, Vitamin K Quinone, Vitamin K Epoxide Reductase Vitamin K 1 Epoxidase; Vitamin K 2,3 Epoxide Reductase; Vitamin K 2,3-Epoxide Reductase; Vitamin K Epoxide Reductase; Vitamin K Epoxidase; Epoxidase, Vitamin K , Vitamin K Quinone; Vitamin K2; Menaquinone; Menaquinones Vitamin K1; Phyllohydroquinone; Phylloquinone; Phytonadione; Phytomenadione; Aquamephyton; Konakion Vitamin K3 Sodium Bisulfite; 2-Methyl-1,4-naphthoquinone; 2-Methyl-1,4-naphthalenedione; Menadione Sodium Bisulfite, Trihydrate; Menadione Sodium Bisulfite; Bisulfite, Menadione Sodium; Sodium Bisulfite, Menadione; Menadione Bisulfite; Bisulfite, Menadione; 2-Methylnaphthoquinone; Vitamin K3; Vicasol; Menadione; Vikasol

| Sr. no. | Term                                     | Results |
|---------|------------------------------------------|---------|
| 1       | Vitamin K                                | 621     |
| 2       | Vitamin K                                | 5920    |
| 3       | Vitamin K1                               | 228     |
| 4       | Vitamin K2                               | 220     |
| 5       | Vitamin K3                               | 32      |
| 6       | Phylloquinone                            | 296     |
| 7       | Menaquinone                              | 106     |
| 8       | Vitamin K1 AND Vitamin K2                | 30      |
| 9       | Vitamin K1 AND Vitamin K2 AND Vitamin K3 | 5       |

## Osteoporosis

**Phrase matches:** Osteoporosis, Involutional; Osteoporoses, Senile; Senile Osteoporosis; Senile Osteoporoses; Osteoporosis, Senile; Post-Traumatic Osteoporoses; Osteoporosis, Post Traumatic; Osteoporosis, Post-Traumatic; Post-Traumatic Osteoporosis; Osteoporoses; Bone Loss, Age-Related; Osteoporosis, Age-Related; Osteoporosis, Age Related; Bone Loss, Age Related; Age Related Osteoporosis; Age-Related Bone Losses; Age-Related Osteoporoses; Osteoporoses, Age-Related; Age-Related Osteoporosis; Age-Related Bone Loss; Bone Losses, Age-Related

### Osteoporosis, Postmenopausal

Synonyms: Postmenopausal Osteoporosis; Osteoporosis, Post Menopausal; Osteoporosis, Post-Menopausal; Post-Menopausal Osteoporosis

## Bone Density

Synonyms: Bone Mineral Densities; Bone Densities; Density, Bone; Bone Mineral Density; Density, Bone Mineral; Bone Mineral Content; Bone Mineral Content

### Bone Diseases, Metabolic

Synonyms: Low Bone Mineral Density; Low Bone Density; Bone Density, Low; Low Bone Densities; Metabolic Bone Disease; Bone Disease, Metabolic; Metabolic Bone Diseases; Osteopenia; Osteopenia

## Fractures, Bone

Synonyms: Spiral Fractures; Fractures, Torsion; Torsion Fracture; Fractures, Spiral; Fracture, Torsion; Fracture, Spiral; Spiral Fracture; Torsion Fractures; Bones, Broken; Fracture, Bone; Broken Bones; Bone Fracture; Broken Bone; Bone, Broken; Bone

| Sr. No. | Term                | Results |
|---------|---------------------|---------|
| 1       | Osteoporosis (MeSH) | 4112    |

|   |                                             |       |
|---|---------------------------------------------|-------|
| 2 | Osteoporosis                                | 11646 |
| 3 | Bone Mineral Density (MeSH)                 | 4621  |
| 4 | Bone Mineral Density                        | 8931  |
| 5 | Bone Fractures (MeSH)                       | 6134  |
| 6 | Bone Fractures                              | 8813  |
| 7 | Fracture, Bone                              | 9548  |
| 8 | Bone density and fractures and osteoporosis | 2176  |

**Advanced search:**

| Sr. no. | Term 1     | Boolean | Term 2               | Results |
|---------|------------|---------|----------------------|---------|
| 1       | Vitamin K1 | AND     | Vitamin K2           | 30      |
| 2       | Vitamin K1 | AND     | osteoporosis         | 28      |
| 3       | Vitamin K1 | AND     | bone density         | 31      |
| 4       | Vitamin K1 | AND     | fractures            | 18      |
| 5       | Vitamin K2 | AND     | osteoporosis         | 54      |
| 6       | Vitamin K2 | AND     | bone mineral density | 56      |
| 7       | Vitamin K2 | AND     | Fractures            | 30      |
| 8       | Vitamin K3 | AND     | osteoporosis         | 2       |
| 9       | Vitamin K3 | AND     | Bone mineral density | 2       |
| 10      | Vitamin K3 | AND     | fractures            | 2       |

| Sr. no. | Term 1     | Boolean | Term 2       | Boolean | Term 3                      | Results |
|---------|------------|---------|--------------|---------|-----------------------------|---------|
| 1       | Vitamin K1 | AND     | Vitamin K2   | AND     | Vitamin K3                  | 5       |
| 2       | Vitamin K1 | AND     | osteoporosis | AND     | randomized control trial    | 14      |
| 3       | Vitamin K2 | AND     | osteoporosis | AND     | randomized controlled trial | 47      |
| 4       | Vitamin K3 | AND     | osteoporosis | AND     | randomized control trial    | 1       |

|   |                                          |     |                                                     |     |                             |    |
|---|------------------------------------------|-----|-----------------------------------------------------|-----|-----------------------------|----|
| 5 | Vitamin K1                               | AND | bone mineral density                                | AND | randomized controlled trial | 17 |
| 6 | Vitamin K2                               | AND | bone mineral density                                | AND | randomized controlled trial | 48 |
| 7 | Vitamin K3                               | AND | bone mineral density                                | AND | randomized controlled trial | 2  |
| 8 | Vitamin K1                               | AND | Fractures, bone                                     | AND | randomized controlled trial | 15 |
| 9 | Vitamin K1 and Vitamin K2 and Vitamin K3 | AND | bone mineral density and fractures and osteoporosis | AND | randomized controlled trial | 2  |

# SUPPLEMENTARY MATERIAL S2

## LEVEL OF EVIDENCE

| Certainty assessment |              |              |               |              |             |                      | № of patients |           | Effect            |                   | Certainty | Importance |
|----------------------|--------------|--------------|---------------|--------------|-------------|----------------------|---------------|-----------|-------------------|-------------------|-----------|------------|
| № of studies         | Study design | Risk of bias | Inconsistency | Indirectness | Imprecision | Other considerations | [Vitamin K]   | [control] | Relative (95% CI) | Absolute (95% CI) |           |            |

(Gerichhausen, 2003)

|   |                   |             |             |             |             |      |                |                |               |  |                  |  |
|---|-------------------|-------------|-------------|-------------|-------------|------|----------------|----------------|---------------|--|------------------|--|
| 1 | randomized trials | not serious | not serious | not serious | not serious | none | 56/66 (84.8 %) | 60/61 (98.4 %) | not estimable |  | ⊕⊕⊕<br>⊕<br>HIGH |  |
|   |                   |             |             |             |             |      |                | 0.0%           |               |  |                  |  |

(Cheung et al., 2008)

|   |                   |             |             |             |             |      |                 |                 |               |  |                  |  |
|---|-------------------|-------------|-------------|-------------|-------------|------|-----------------|-----------------|---------------|--|------------------|--|
| 2 | randomized trials | not serious | not serious | not serious | not serious | none | 33/217 (15.2 %) | 40/223 (17.9 %) | not estimable |  | ⊕⊕⊕<br>⊕<br>HIGH |  |
|   |                   |             |             |             |             |      |                 | 0.0%            |               |  |                  |  |

(Emaus et al., 2010)

|   |                   |             |             |             |             |      |                  |                  |               |  |                  |  |
|---|-------------------|-------------|-------------|-------------|-------------|------|------------------|------------------|---------------|--|------------------|--|
| 3 | randomized trials | not serious | not serious | not serious | not serious | none | 131/153 (85.6 %) | 133/146 (91.1 %) | not estimable |  | ⊕⊕⊕<br>⊕<br>HIGH |  |
|   |                   |             |             |             |             |      |                  | 0.0%             |               |  |                  |  |

(Hirao et al., 2008)

|   |                   |             |             |             |             |      |                |                |               |  |                  |  |
|---|-------------------|-------------|-------------|-------------|-------------|------|----------------|----------------|---------------|--|------------------|--|
| 4 | randomized trials | not serious | not serious | not serious | not serious | none | 23/26 (88.5 %) | 21/22 (95.5 %) | not estimable |  | ⊕⊕⊕<br>⊕<br>HIGH |  |
|   |                   |             |             |             |             |      |                | 0.0%           |               |  |                  |  |

(Ishida & Kawai, 2004)

| Certainty assessment      |                   |              |               |              |             |                      | N <sub>2</sub> of patients |               | Effect            |                   | Certainty         | Importance |
|---------------------------|-------------------|--------------|---------------|--------------|-------------|----------------------|----------------------------|---------------|-------------------|-------------------|-------------------|------------|
| N <sub>2</sub> of studies | Study design      | Risk of bias | Inconsistency | Indirectness | Imprecision | Other considerations | [Vitamin K]                | [control]     | Relative (95% CI) | Absolute (95% CI) |                   |            |
| 5                         | randomized trials | not serious  | not serious   | not serious  | not serious | none                 | 60/66 (90.9%)              | 63/66 (95.5%) | not estimable     |                   | ⊕⊕⊕⊕<br>⊕<br>HIGH |            |
|                           |                   |              |               |              |             |                      |                            | 0.0%          |                   |                   |                   |            |

(Je et al., 2011)

|   |                   |             |             |             |             |      |               |               |               |  |                   |  |
|---|-------------------|-------------|-------------|-------------|-------------|------|---------------|---------------|---------------|--|-------------------|--|
| 6 | randomized trials | not serious | not serious | not serious | not serious | none | 27/40 (67.5%) | 18/38 (47.4%) | not estimable |  | ⊕⊕⊕⊕<br>⊕<br>HIGH |  |
|   |                   |             |             |             |             |      |               | 0.0%          |               |  |                   |  |

(Kasukawa et al., 2013)

|   |                   |             |                      |             |             |      |               |               |               |  |                  |  |
|---|-------------------|-------------|----------------------|-------------|-------------|------|---------------|---------------|---------------|--|------------------|--|
| 7 | randomized trials | not serious | serious <sup>a</sup> | not serious | not serious | none | 29/50 (58.0%) | 26/51 (51.0%) | not estimable |  | ⊕⊕⊕○<br>MODERATE |  |
|   |                   |             |                      |             |             |      |               | 0.0%          |               |  |                  |  |

(Morishita et al., 2008)

|   |                   |             |             |             |             |      |  |  |               |  |              |  |
|---|-------------------|-------------|-------------|-------------|-------------|------|--|--|---------------|--|--------------|--|
| 8 | randomized trials | not serious | not serious | not serious | not serious | none |  |  | not estimable |  | ⊕⊕⊕⊕<br>HIGH |  |
|---|-------------------|-------------|-------------|-------------|-------------|------|--|--|---------------|--|--------------|--|

(Purwosunu et al., 2006)

|   |                   |             |             |             |             |      |                |                |               |  |              |  |
|---|-------------------|-------------|-------------|-------------|-------------|------|----------------|----------------|---------------|--|--------------|--|
| 9 | randomized trials | not serious | not serious | not serious | not serious | none | 33/33 (100.0%) | 30/30 (100.0%) | not estimable |  | ⊕⊕⊕⊕<br>HIGH |  |
|   |                   |             |             |             |             |      |                | 0.0%           |               |  |              |  |

(Somekawa et al., 2015)

|    |                   |             |             |             |             |      |  |  |               |  |              |  |
|----|-------------------|-------------|-------------|-------------|-------------|------|--|--|---------------|--|--------------|--|
| 10 | randomized trials | not serious | not serious | not serious | not serious | none |  |  | not estimable |  | ⊕⊕⊕⊕<br>HIGH |  |
|----|-------------------|-------------|-------------|-------------|-------------|------|--|--|---------------|--|--------------|--|

(Shea et al., 2008)

|    |                   |         |             |             |             |      |                 |                 |  |  |  |  |
|----|-------------------|---------|-------------|-------------|-------------|------|-----------------|-----------------|--|--|--|--|
| 11 | randomized trials | serious | not serious | not serious | not serious | none | 189/229 (82.5%) | 190/223 (85.2%) |  |  |  |  |
|----|-------------------|---------|-------------|-------------|-------------|------|-----------------|-----------------|--|--|--|--|

|  |  |  |  |  |  |  |  |      |               |                  |  |
|--|--|--|--|--|--|--|--|------|---------------|------------------|--|
|  |  |  |  |  |  |  |  | 0.0% | not estimable | ⊕⊕⊕○<br>MODERATE |  |
|--|--|--|--|--|--|--|--|------|---------------|------------------|--|

(Shiraki et al., 2000)

|    |                   |             |             |             |             |      |  |  |               |              |  |
|----|-------------------|-------------|-------------|-------------|-------------|------|--|--|---------------|--------------|--|
| 12 | randomized trials | not serious | not serious | not serious | not serious | none |  |  | not estimable | ⊕⊕⊕⊕<br>HIGH |  |
|----|-------------------|-------------|-------------|-------------|-------------|------|--|--|---------------|--------------|--|

(Mott et al., 2020)

|    |                   |         |             |             |             |      |  |  |               |                  |  |
|----|-------------------|---------|-------------|-------------|-------------|------|--|--|---------------|------------------|--|
| 13 | randomized trials | serious | not serious | not serious | not serious | none |  |  | not estimable | ⊕⊕⊕○<br>MODERATE |  |
|----|-------------------|---------|-------------|-------------|-------------|------|--|--|---------------|------------------|--|

(Volpe et al., 2008)

|    |                   |             |             |             |             |      |                 |                 |               |              |  |
|----|-------------------|-------------|-------------|-------------|-------------|------|-----------------|-----------------|---------------|--------------|--|
| 14 | randomized trials | not serious | not serious | not serious | not serious | none | 8/11<br>(72.7%) | 6/10<br>(60.0%) | not estimable | ⊕⊕⊕⊕<br>HIGH |  |
|    |                   |             |             |             |             |      |                 | 0.0%            |               |              |  |

(Binkley et al., 2009)

|    |                   |             |             |             |             |      |                    |                    |               |              |  |
|----|-------------------|-------------|-------------|-------------|-------------|------|--------------------|--------------------|---------------|--------------|--|
| 15 | randomized trials | not serious | not serious | not serious | not serious | none | 115/129<br>(89.1%) | 108/126<br>(85.7%) | not estimable | ⊕⊕⊕⊕<br>HIGH |  |
|    |                   |             |             |             |             |      |                    | 0.0%               |               |              |  |

(Bolton-Smith et al., 2007)

|    |                   |             |             |             |             |      |                  |                  |               |              |  |
|----|-------------------|-------------|-------------|-------------|-------------|------|------------------|------------------|---------------|--------------|--|
| 16 | randomised trials | not serious | not serious | not serious | not serious | none | 56/61<br>(91.8%) | 54/60<br>(90.0%) | not estimable | ⊕⊕⊕⊕<br>HIGH |  |
|    |                   |             |             |             |             |      |                  | 0.0%             |               |              |  |

(Knapen et al., 2007)

|    |                   |             |             |             |             |      |                    |                    |               |              |  |
|----|-------------------|-------------|-------------|-------------|-------------|------|--------------------|--------------------|---------------|--------------|--|
| 17 | randomized trials | not serious | not serious | not serious | not serious | none | 133/161<br>(82.6%) | 124/164<br>(75.6%) | not estimable | ⊕⊕⊕⊕<br>HIGH |  |
|    |                   |             |             |             |             |      |                    | 0.0%               |               |              |  |

(Vermeer & Knapen, 2016)

|    |                   |             |             |             |             |      |                    |                    |               |              |  |
|----|-------------------|-------------|-------------|-------------|-------------|------|--------------------|--------------------|---------------|--------------|--|
| 18 | randomized trials | not serious | not serious | not serious | not serious | none | 111/120<br>(92.5%) | 112/124<br>(90.3%) | not estimable | ⊕⊕⊕⊕<br>HIGH |  |
|    |                   |             |             |             |             |      |                    | 0.0%               |               |              |  |

(Yuanyang et al., 2019)

|    |                   |             |             |             |             |      |                   |                   |               |  |              |  |
|----|-------------------|-------------|-------------|-------------|-------------|------|-------------------|-------------------|---------------|--|--------------|--|
| 19 | randomized trials | not serious | not serious | not serious | not serious | none | 70/70<br>(100.0%) | 70/70<br>(100.0%) | not estimable |  | ⊕⊕⊕⊕<br>HIGH |  |
|    |                   |             |             |             |             |      |                   | 0.0%              |               |  |              |  |

(Iwamoto et al., 1999)

|    |                   |             |             |             |             |      |  |  |               |  |              |  |
|----|-------------------|-------------|-------------|-------------|-------------|------|--|--|---------------|--|--------------|--|
| 20 | randomized trials | not serious | not serious | not serious | not serious | none |  |  | not estimable |  | ⊕⊕⊕⊕<br>HIGH |  |
|----|-------------------|-------------|-------------|-------------|-------------|------|--|--|---------------|--|--------------|--|
